# Supplementary material for: Neurodevelopmental correlates of the emerging adult self
Source: PubMed Central journal article supplement — Dev Cogn Neurosci. 2019 Feb 16;36:100626. doi: 10.1016/j.dcn.2019.100626 (PMC6969193; doi:10.1016/j.dcn.2019.100626), 2019-02-16
Supplement: mmc1.pdf [file mmc1.pdf]

**Supplementary Table 1. Coordinates of the nodes for inclusion in graph analysis**

| Node                           | Coordinates |     |     | Edges |
|--------------------------------|-------------|-----|-----|-------|
|                                | x           | y   | z   |       |
| <u>Anterior DMN component</u>  |             |     |     |       |
| Dorsomedial prefrontal         | 0           | 60  | 24  | 4     |
| Left anterior prefrontal       | -12         | 45  | 45  | 1     |
| Right anterior prefrontal      | 15          | 51  | 39  | 2     |
| Left dorsolateral prefrontal   | -42         | 18  | 48  | 4     |
| Posterior cingulate            | 2           | -47 | 25  | 2     |
| Left inferior parietal lobule  | -47         | -59 | 24  | 4     |
| Right superior occipital       | 33          | -81 | 12  | 1     |
| Right inferior occipital       | 45          | -66 | -9  | 1     |
| Left inferior occipital        | -42         | -75 | -9  | 2     |
| Left occipital cortex          | -33         | -84 | 0   | 0     |
| Left occipital cortex          | -24         | -81 | 18  | 4     |
| Right inferior parietal lobule | 50          | -56 | 24  | 7     |
| Left orbitofrontal             | -42         | 18  | -18 | 2     |
| Left temporal pole             | -36         | 21  | -33 | 2     |
| Right orbitofrontal            | 42          | 21  | -18 | 4     |
| Left posterior temporal        | -60         | -18 | -12 | 2     |
| Anterior PCC                   | 0           | -18 | 39  | 2     |
| Left anterior temporal         | -48         | 0   | -36 | 5     |
| Right superior parietal lobule | 21          | -60 | 57  | 1     |
| Right anterior temporal        | 48          | 0   | -38 | 2     |
| Right caudate                  | 12          | 18  | 9   | 3     |
| Left caudate                   | -12         | 15  | 9   | 7     |
| <u>Posterior DMN component</u> |             |     |     |       |
| Precuneus                      | 2           | -69 | 32  | 5     |
| Right inferior parietal lobule | 42          | -69 | 36  | 5     |
| Left inferior parietal lobule  | -36         | -75 | 36  | 15    |
| Right thalamus                 | 9           | -24 | 12  | 2     |
| Left thalamus                  | -6          | -18 | 9   | 2     |
| Ventromedial prefrontal        | 3           | 57  | -9  | 5     |
| Pregenua anterior cingulate    | -3          | 39  | 9   | 2     |
| Right dorsolateral prefrontal  | 24          | 27  | 39  | 1     |
| Brain stem                     | 6           | -33 | -48 | 4     |
| Right posterior temporal       | 57          | -9  | -15 | 5     |
| Left dorsolateral prefrontal   | -21         | 30  | 36  | 4     |

**Supplementary Table 2. Connectivity results with and without covariates**

|                                                                        | r             | <i>p</i> -value |
|------------------------------------------------------------------------|---------------|-----------------|
| <u>Component interactions</u>                                          |               |                 |
| Including reaction times and vocabulary<br>(as reported in manuscript) | -0.31         | 0.004           |
| Without covariates                                                     | -0.33         | 0.002           |
| <u>Network connectivity</u>                                            |               |                 |
|                                                                        | Nodes [edges] | <i>p</i> -value |
| Including reaction times and vocabulary<br>(as reported in manuscript) | 32 [56]       | 0.03            |
| Without covariates                                                     | 31 [59]       | 0.02            |

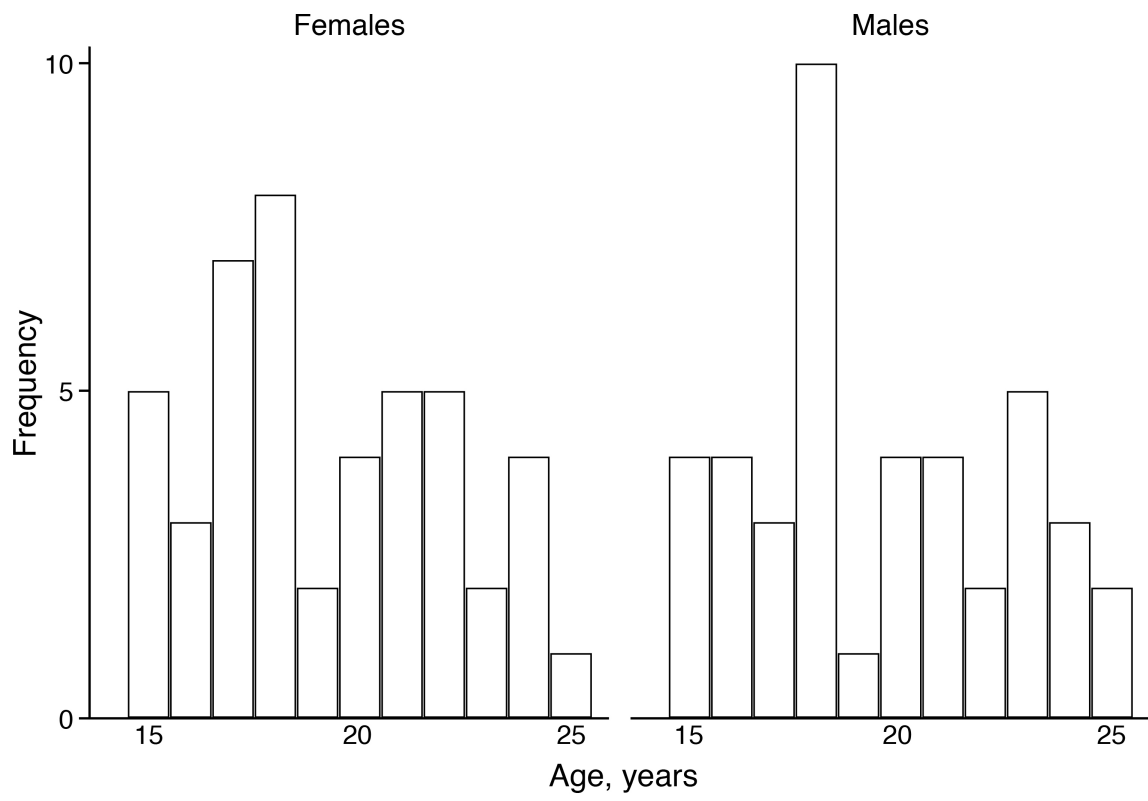

**Supplementary Figure 1.** Histogram of age of participants by sex.

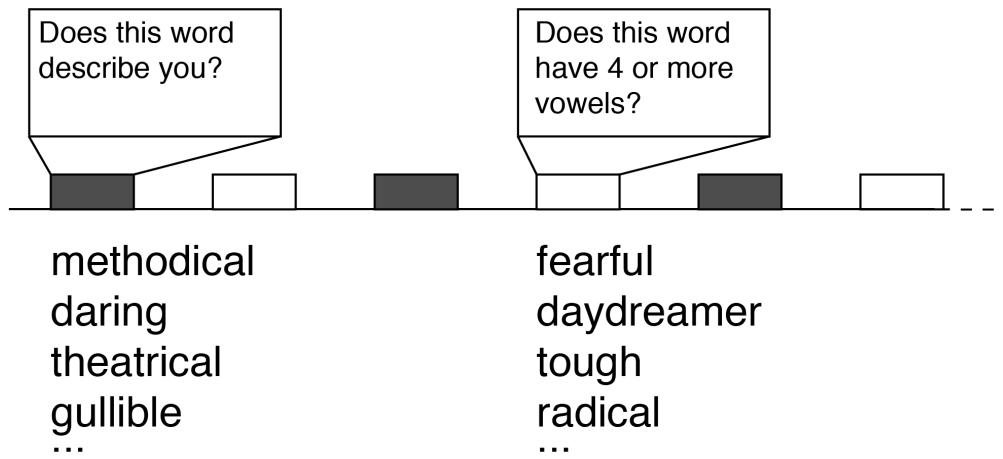

**Supplementary Figure 2.** The experimental task consisted of self-appraisal and external attention blocks, interspersed with periods of rest-fixation.

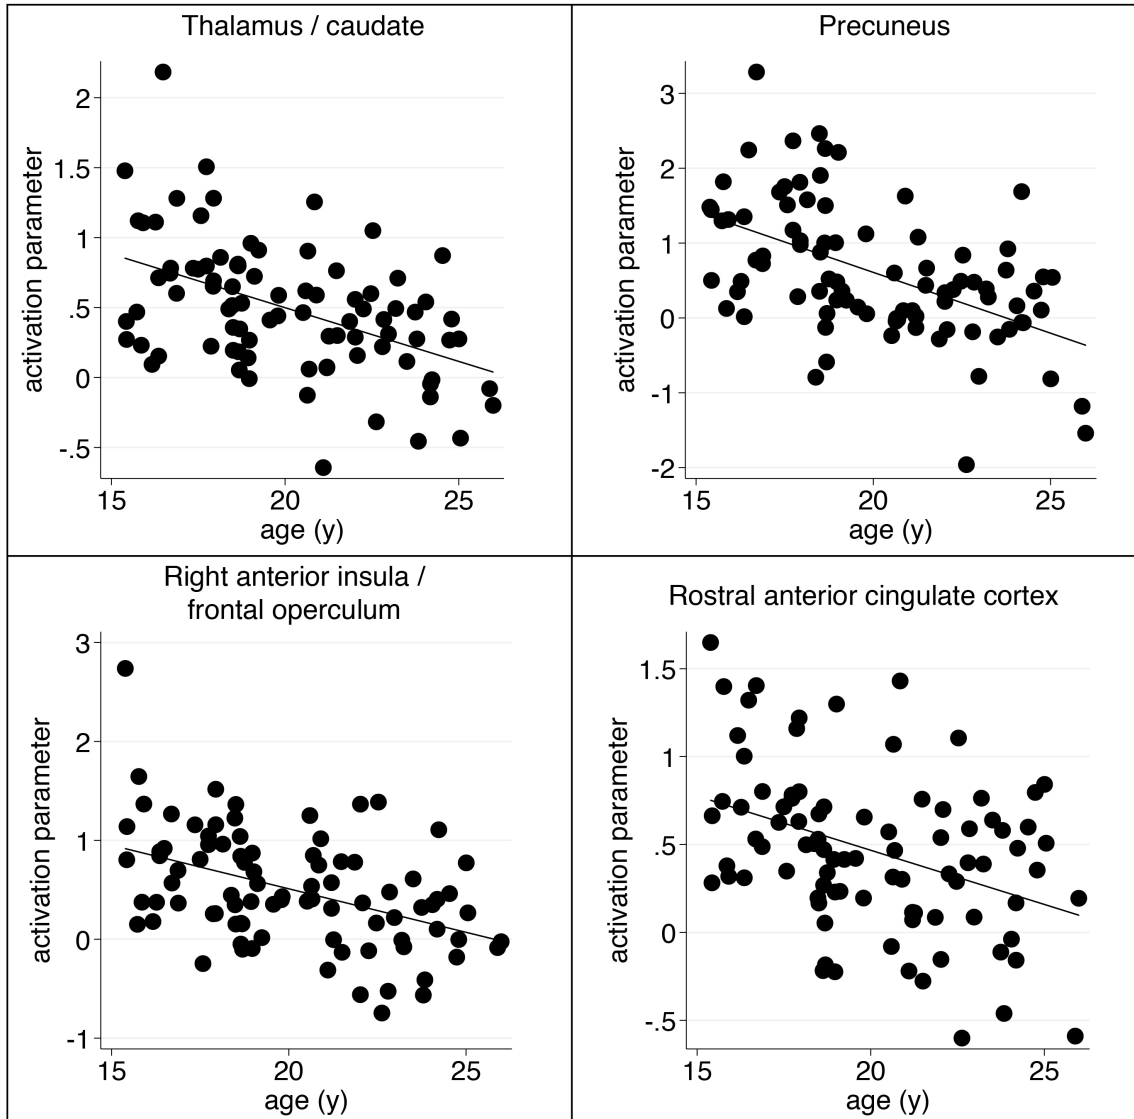

**Supplementary Figure 3.** Plots of the associations between activations to self-appraisal (compared with external attention) and age.

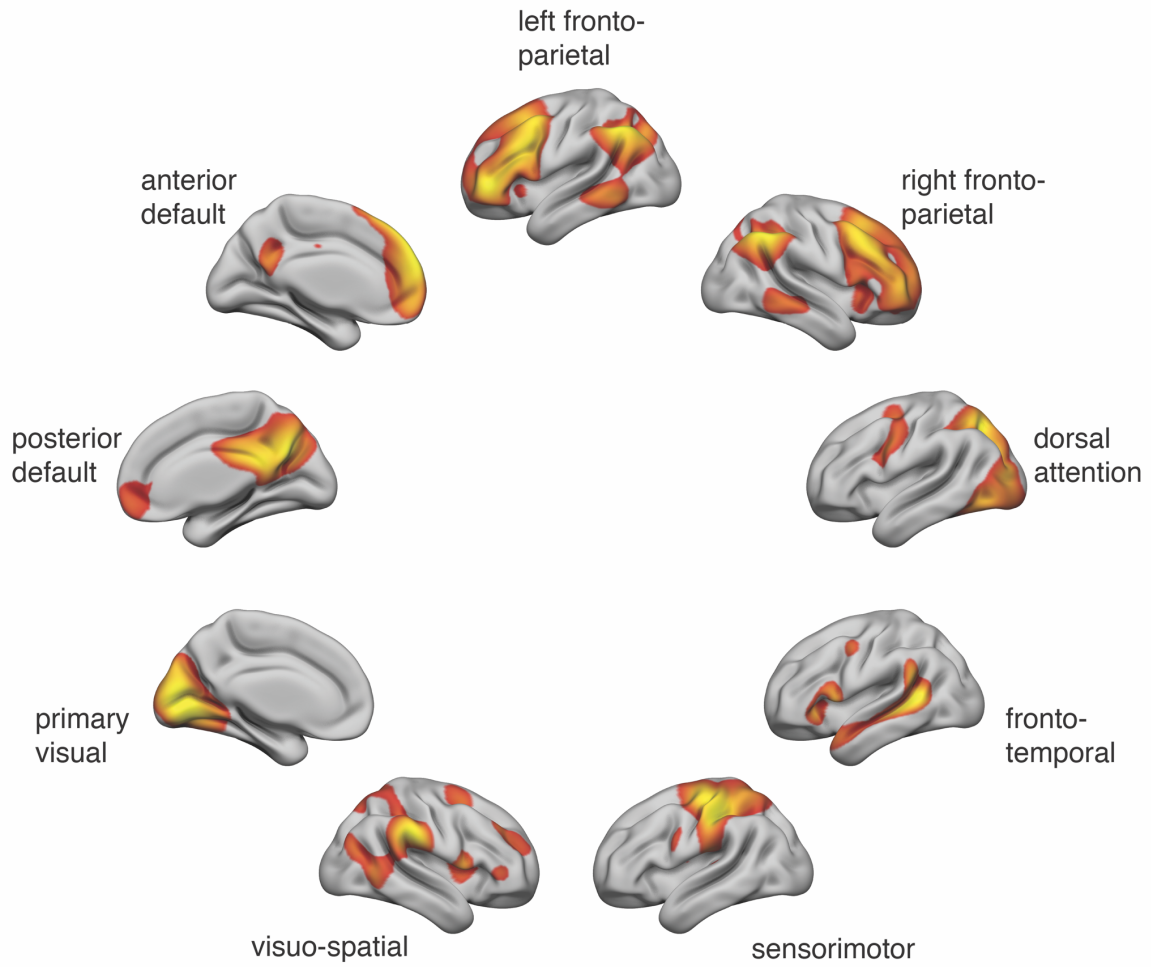

**Supplementary Figure 4.** Independent component analysis identified 9 brain networks.
